# Supplementary material
Source: PubMed Central journal article supplement (PMC9064993)

**Supplemental Figure 1.** Meta-analysis of associations between delay discounting and narcissism overall. Buelow and Brunell (2014) is the average effect of associations between DD and the Psychological Entitlement and Narcissistic Grandiosity Scales, as well as the Leadership/Authority, Grandiose Exhibitionism, and Entitlement/Exploitativeness subscales of the Narcissistic Personality Inventory. Malesza & Kaczmarek (2018) is the average effect for associations between DD and the Narcissistic Personality Inventory and DD and the Hypersensitive Narcissism Scale.

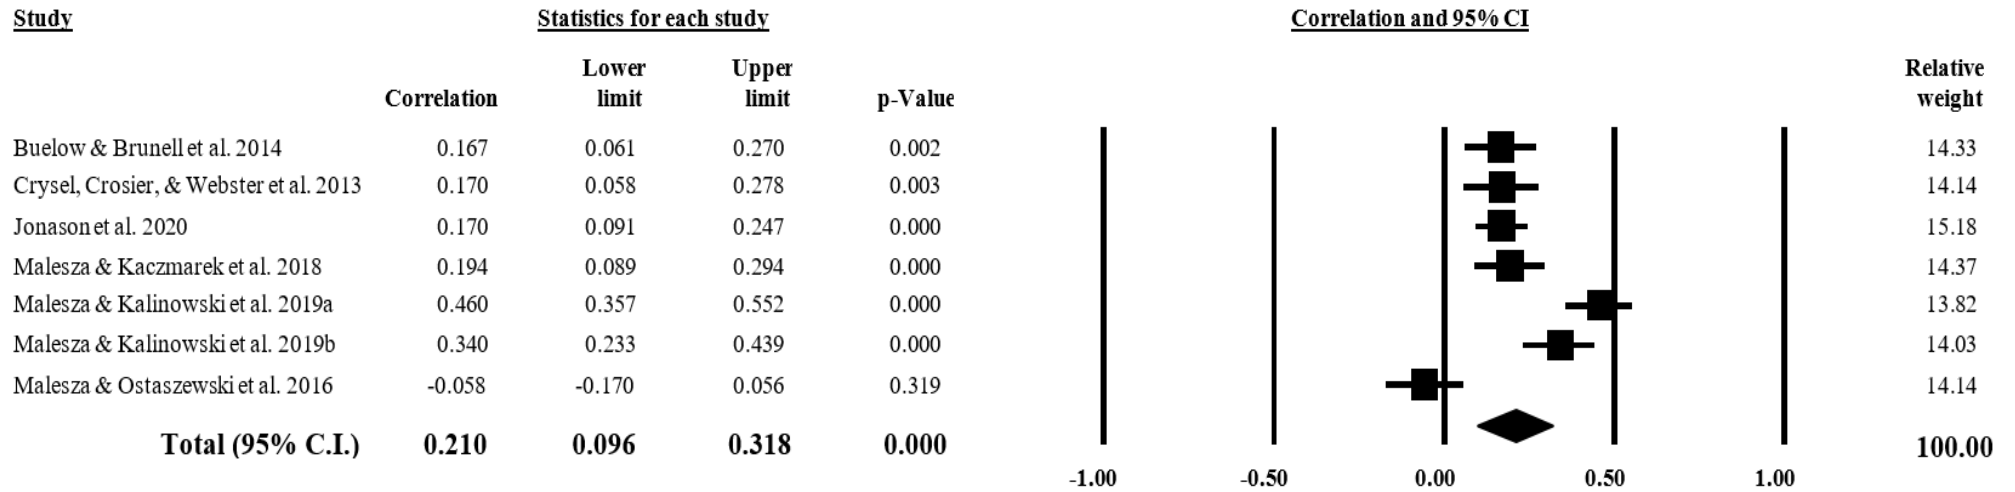

Supplement: NIHMS1789429-supplement-Supp_Fig_1.pdf [file NIHMS1789429-supplement-Supp_Fig_1.pdf]
