# Supplementary material
Source: PubMed Central journal article supplement (PMC9064993)

**Supplemental Figure 2.** Meta-analysis of associations between delay discounting and grandiosity. Buelow and Brunell (2014) is the average effect for associations between DD and the Narcissistic Grandiosity Scale and the Leadership/Authority and Grandiose Exhibitionism subscales of the Narcissistic Personality Inventory.

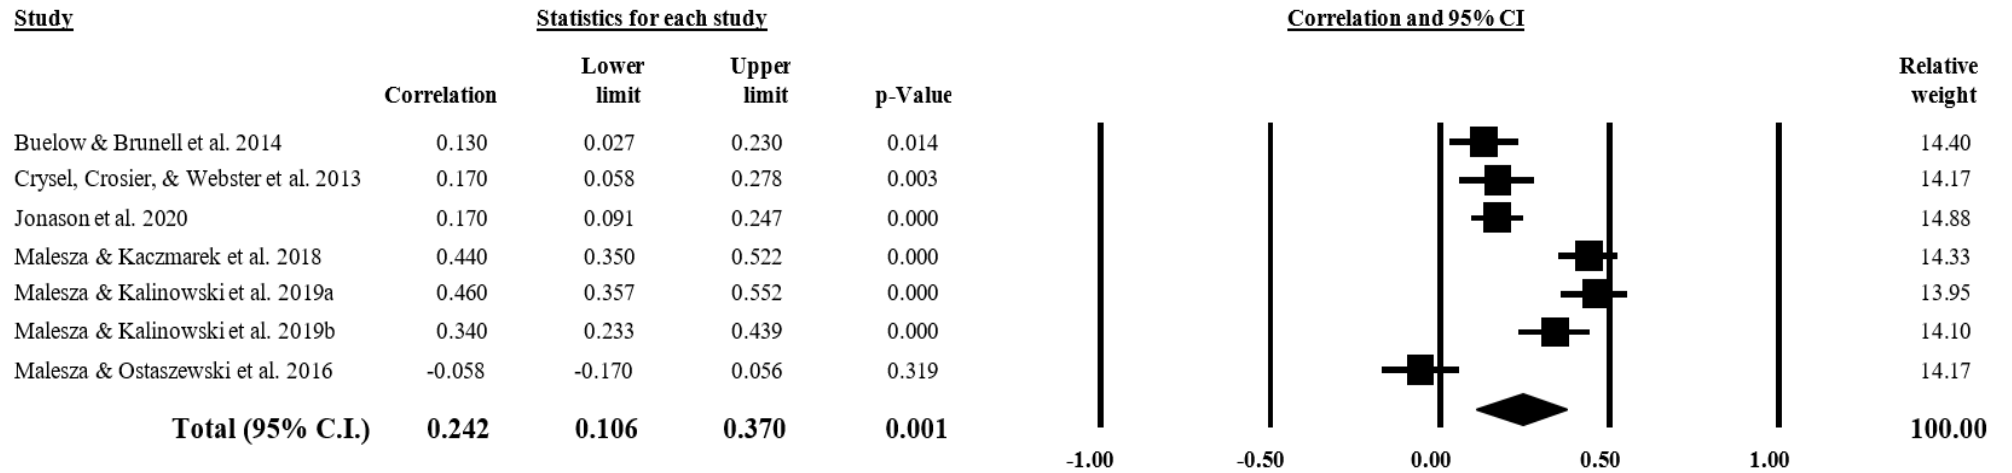

Supplement: NIHMS1789429-supplement-Supp_Fig_2.pdf [file NIHMS1789429-supplement-Supp_Fig_2.pdf]
